# Supplementary material
Source: PubMed Central journal article supplement (PMC8013832)
Supplement: EMBJ-40-e106065-s002.pdf [file EMBJ-40-e106065-s002.pdf]

## **Table of Content**

**Appendix Table S1:** sgRNA sequences used in this study

**Appendix Table S2:** Primers used in this study

**Appendix Figure S1:** Effect of 5-FU treatment on intratumoral dendritic cells

**Appendix Figure S2:** Analysis of intratumoral T cells after 5-FU

treatment

**Appendix Figure S3:** Effect of 5-FU on surface antigens in intratumoral CD45<sup>-</sup> cells

| <b>sgRNA sequences</b> |       |                       |
|------------------------|-------|-----------------------|
| STING sgRNA 1          | mouse | GTAGAATCATAGCCATACAG  |
| STING sgRNA 2          | mouse | GAAGGCCAAACATCCAAGT   |
| STING sgRNA 3          | mouse | CAGTAGTCCAAGTTCGTGCG  |
| cGAS sgRNA 1           | mouse | CAGAATGCAGAAACGGGAGT  |
| cGAS sgRNA 2           | mouse | GAGGCGCGGAAAGTCGTAAG  |
| Ifnb1 sgRNA 1          | mouse | GAAACAATTTCTCCAGCACT  |
| Ifnb1 sgRNA 2          | mouse | GTTTCTGAAGACAGTACTAG  |
| Ifna1 sgRNA 1          | mouse | TCACATCCTAGAGAGCAGGT  |
| Ifna1 sgRNA 2          | mouse | GAAGATGTTTCAGGATCTGCT |
| Ifnar1 sgRNA 1         | mouse | TTCAGCAGAATATCGAACGT  |
| Ifnar1 sgRNA 2         | mouse | CTTCTAAACGTAAGTCTGGG  |

**Appendix Table S1. sgRNA sequences used in this study.**

| <b>RT primers</b> |       |                         |
|-------------------|-------|-------------------------|
| lfnb1-f           | mouse | CCCTATGGAGATGACGGAGA    |
| lfnb1-r           | mouse | CCCAGTGCTGGAGAAATTGT    |
| lrf7-f            | mouse | AGAGGGCGTTTTATCTTGCG    |
| lrf7-r            | mouse | TGGAGCCCAGCATTTTCTCT    |
| Stat1-f           | mouse | CACGCTGCCTATGATGTCTC    |
| Stat1-r           | mouse | ACGCTTGCTTTTCCGTATGT    |
| lfit1-f           | mouse | CAGAAGCACACATTGAAGAA    |
| lfit1-r           | mouse | TGTAAGTAGCCAGAGGAAGG    |
| Gapdh-f           | mouse | ATGTGTCCGTCGTGGATCTGAC  |
| Gapdh-r           | mouse | AGACAACCTGGTCCTCAGTGTAG |

**Appendix Table S2. Primers used in this study.**

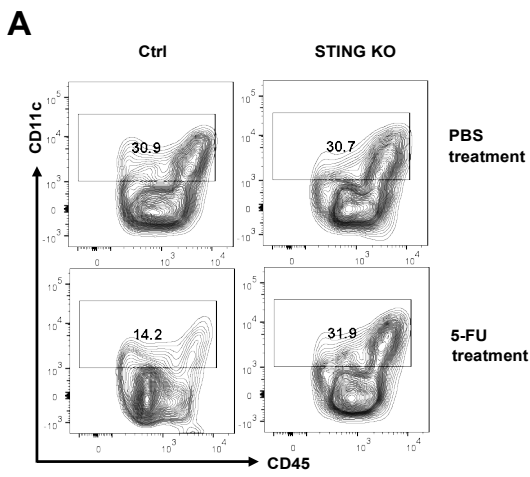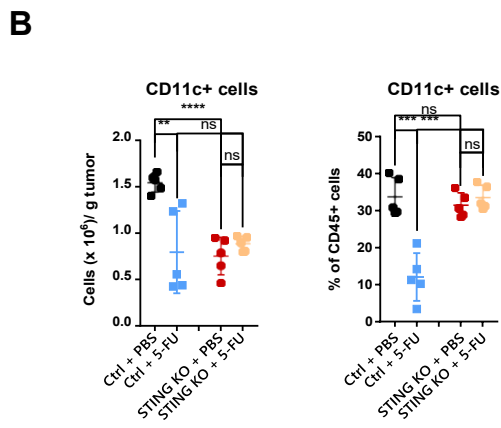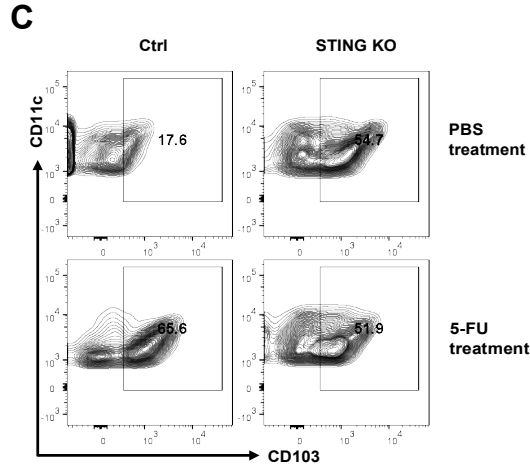

Tian et al. Appendix Figure S1

**Appendix Figure S1. Effect of 5-FU treatment on intratumoral dendritic cells.**

**A.** Representative flow cytometry plots showing the percentages of intratumoral CD11c<sup>+</sup> cells, after gating on CD45<sup>+</sup> cells.

**B.** The counts of intratumoral CD11c<sup>+</sup> cells per gram of tumor were quantified (left panel). The percentages of CD11c<sup>+</sup> cells within intratumoral CD45<sup>+</sup> cells (right panel). Each dot represents one mouse. N=5.

**C.** Representative flow cytometry plots showing the percentages of CD103<sup>+</sup> cells within intratumoral CD11c<sup>+</sup> cells.

For all panels, error bars represent s.d., and center values represent mean. Two-tailed unpaired student's t-test was used. \*\*:  $p < 0.01$ ; \*\*\*:  $p < 0.001$ ; \*\*\*\*:  $p < 0.0001$ ; ns: not significant.

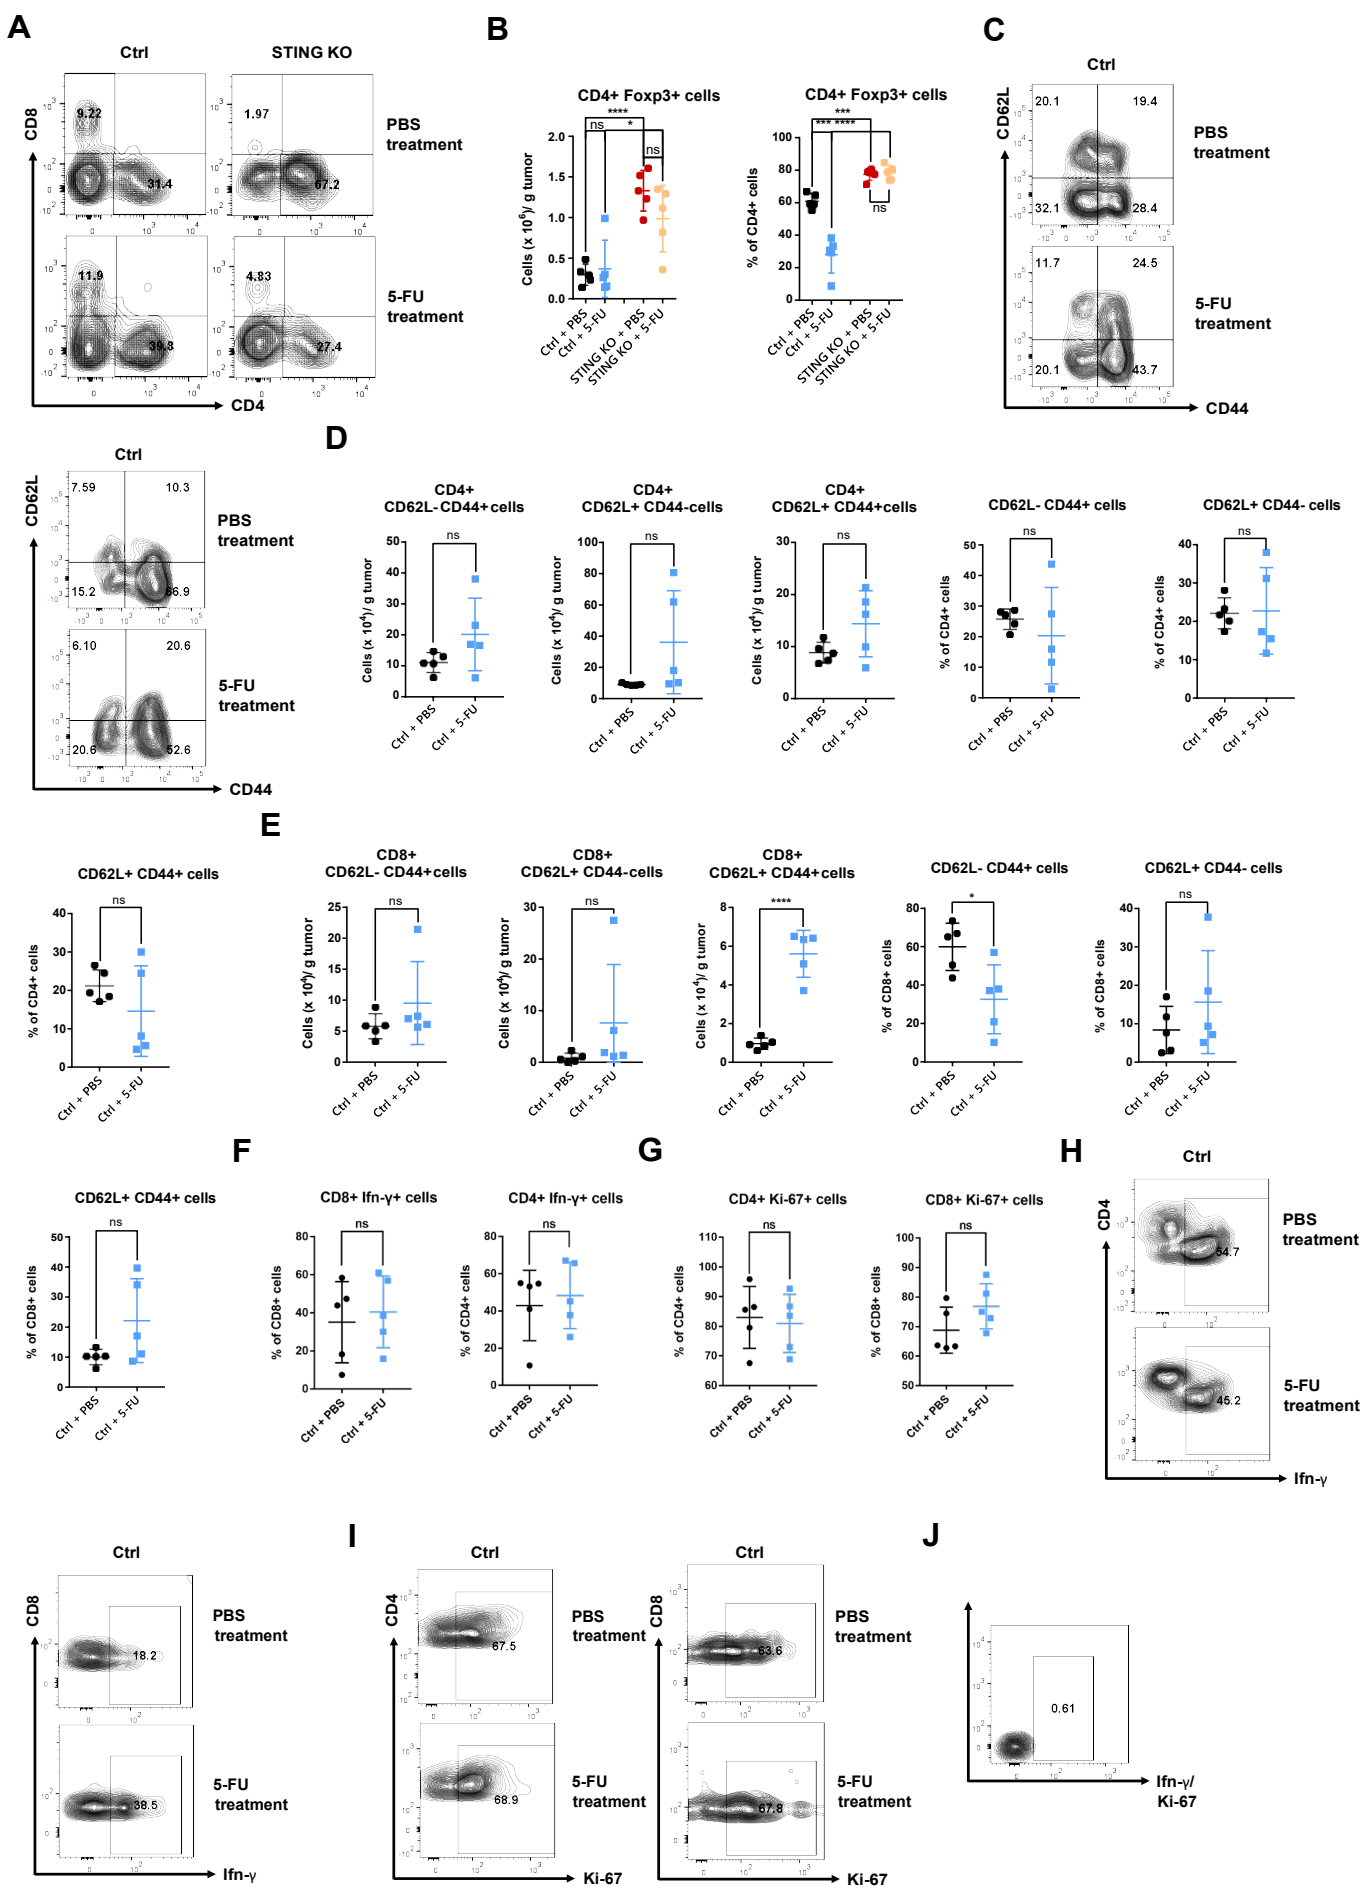

## Appendix Figure S2. Analysis of intratumoral T cells after 5-FU treatment

**A.** Representative flow cytometry plots showing the percentages of CD4<sup>+</sup> or CD8<sup>+</sup> T cells within intratumoral CD3<sup>+</sup> cells.

**B.** (Left) The counts of intratumoral Tregs (CD4<sup>+</sup>FoxP3<sup>+</sup>) per gram of tumor were quantified. (Right) The percentages of Tregs among CD4<sup>+</sup> cells were quantified. N=5. Each dot represents one mouse.

**C.** Representative flow cytometry plots analyzing intratumoral CD4<sup>+</sup> (left panel) or CD8<sup>+</sup> (right panel) T cells with CD62L and CD44.

**D.** The counts of CD4<sup>+</sup> intratumoral CD62L<sup>-</sup>CD44<sup>+</sup>, CD62L<sup>+</sup>CD44<sup>-</sup>, and CD62L<sup>+</sup>CD44<sup>+</sup> cells per gram of tumor were quantified. Additionally, the corresponding percentage of each population among CD4<sup>+</sup> T cells were quantified. N=5. Each dot represents one mouse.

**E.** The counts of CD8<sup>+</sup> intratumoral CD62L<sup>-</sup>CD44<sup>+</sup>, CD62L<sup>+</sup>CD44<sup>-</sup>, and CD62L<sup>+</sup>CD44<sup>+</sup> cells per gram of tumor were quantified. Additionally, the corresponding percentage of each population among CD8<sup>+</sup> T cells were quantified. N=5. Each dot represents one mouse.

**F-J.** Control MC38 cells were injected into mice and mice were treated with 5-FU or PBS. Tumors were harvested at 2 weeks post cancer cell injection. **(F)** The percentages of intratumoral Ifn- $\gamma$ <sup>+</sup> cells within CD4<sup>+</sup> (left panel) or CD8<sup>+</sup> (right panel) cells were quantified. **(G)** The percentages of intratumoral Ki67<sup>+</sup> cells within CD4<sup>+</sup> (left panel) or CD8<sup>+</sup> (right panel) cells were quantified. Each dot represents one mouse. **(H)** Representative flow cytometry plots showing the percentages of Ifn- $\gamma$ <sup>+</sup> cells within CD4<sup>+</sup> and CD8<sup>+</sup> cells. **(I)** Representative flow cytometry plots showing the percentages of Ki67<sup>+</sup> cells within CD4<sup>+</sup> and CD8<sup>+</sup> cells. **(J)** Flow cytometry plots showing the negative control of staining for (H) and (I).

For all panels, error bars represent s.d., and center values represent mean. Two-tailed unpaired student's t-test was used. \*: p < 0.05; \*\*\*\*: p < 0.0001; ns: not significant.

**A**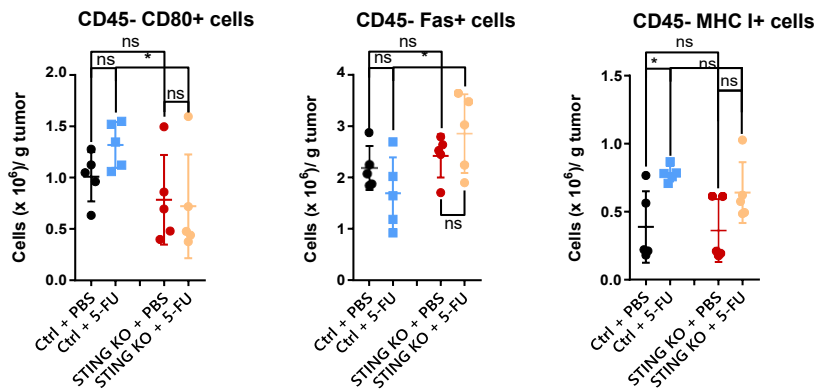**B**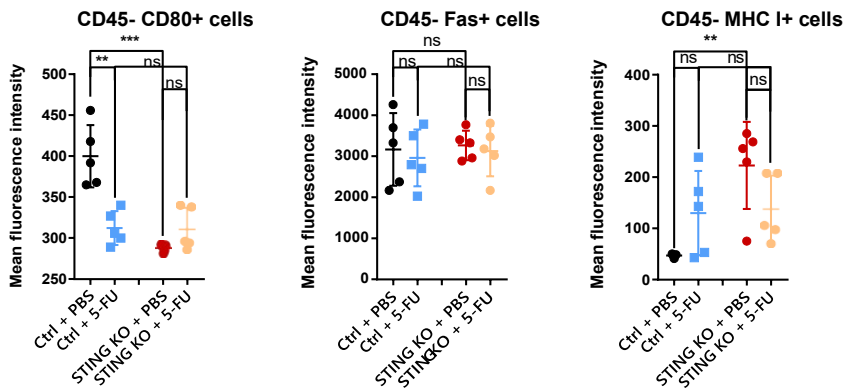

Tian et al. Appendix Figure S3

**Appendix Figure S3. Effect of 5-FU on surface antigens in intratumoral CD45<sup>+</sup> cells.**

**A-B.** Mice were injected with control (Ctrl) or STING-KO MC38 cells and treated with PBS or 5-FU. Tumors were harvested 2 weeks after cancer cell injection and intratumoral CD45<sup>+</sup> cells were examined by flow cytometry. **(A)** The counts of CD45<sup>+</sup>CD80<sup>+</sup>, CD45<sup>+</sup>Fas<sup>+</sup>, and CD45<sup>+</sup>MHC-I<sup>+</sup> cells per gram of tumor were quantified. Each dot represents one mouse. N=5. **(B)** The mean fluorescence intensities of CD80, Fas and MHC-I in CD45<sup>+</sup>CD80<sup>+</sup>, CD45<sup>+</sup>Fas<sup>+</sup>, and CD45<sup>+</sup>MHC-I<sup>+</sup> cells, respectively, were quantified. Each dot represents one mouse. N=5.

For all panels, error bars stand for s.d., and center values represent mean. Two-tailed unpaired student's t-test was used. \*: p < 0.05; ns: not significant. Data are representative of two independent experiments.
